# Supplementary material for: Directed Evolution of a Nonheme Diiron N-oxygenase AzoC for Improving Its Catalytic Efficiency toward Nitrogen Heterocycle Substrates
Source: MDPI journal article supplement (doi:10.3390/molecules27030868), 2022-01-27
Supplement: s1 [file s1]

Supplementary Materials

# Directed evolution of a nonheme diiron N-oxygenase AzoC for improving its catalytic efficiency toward nitrogen heterocycle substrates

Ye Xu<sup>1,2</sup>, Xiao-Fang Liu<sup>1,2</sup>, Xin-Ai Chen<sup>1,2\*</sup> and Yong-Quan Li<sup>1,2\*</sup>

<sup>1</sup> Institute of Pharmaceutical Biotechnology, School of Medicine, Zhejiang University, Hangzhou 310058, China

<sup>2</sup> Zhejiang Provincial Key Laboratory for Microbial Biochemistry and Metabolic Engineering, Hangzhou 310058, China

\* Correspondence: Y.Q.L.: lyq@zju.edu.cn; Tel. 86-571-88206632; X.A.C.: biolab@zju.edu.cn; Tel:86-571-88208569.

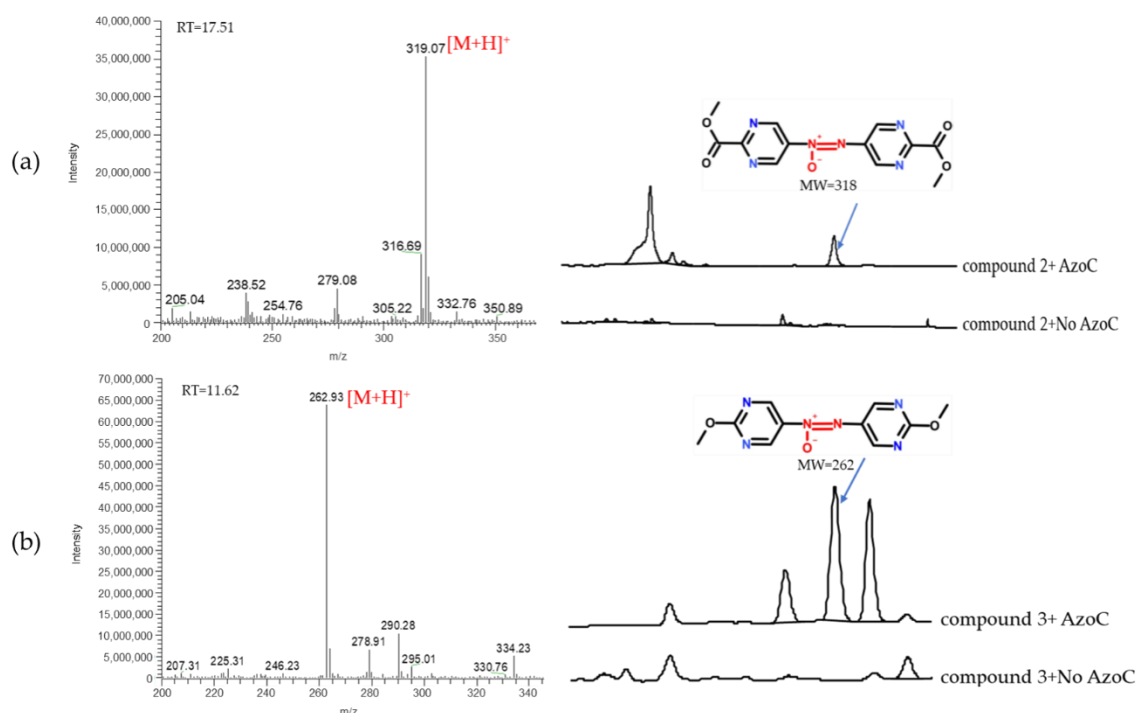

**Figure S1.** (a) LC-MS analysis of AzoC in vitro reaction with methyl 5-aminopyrimidine-2-carboxylate (compound 2) as the substrate. The molecular weight of the generated azoxy product is 318, which is in line with the theoretical value. (b) LC-MS analysis of AzoC in vitro reaction with 2-methoxypyrimidin-5-amine (compound 3) as the substrate. The molecular weight of the generated azoxy product is 262, which is in line with the theoretical value. All reactions were performed at 30 °C for overnight.

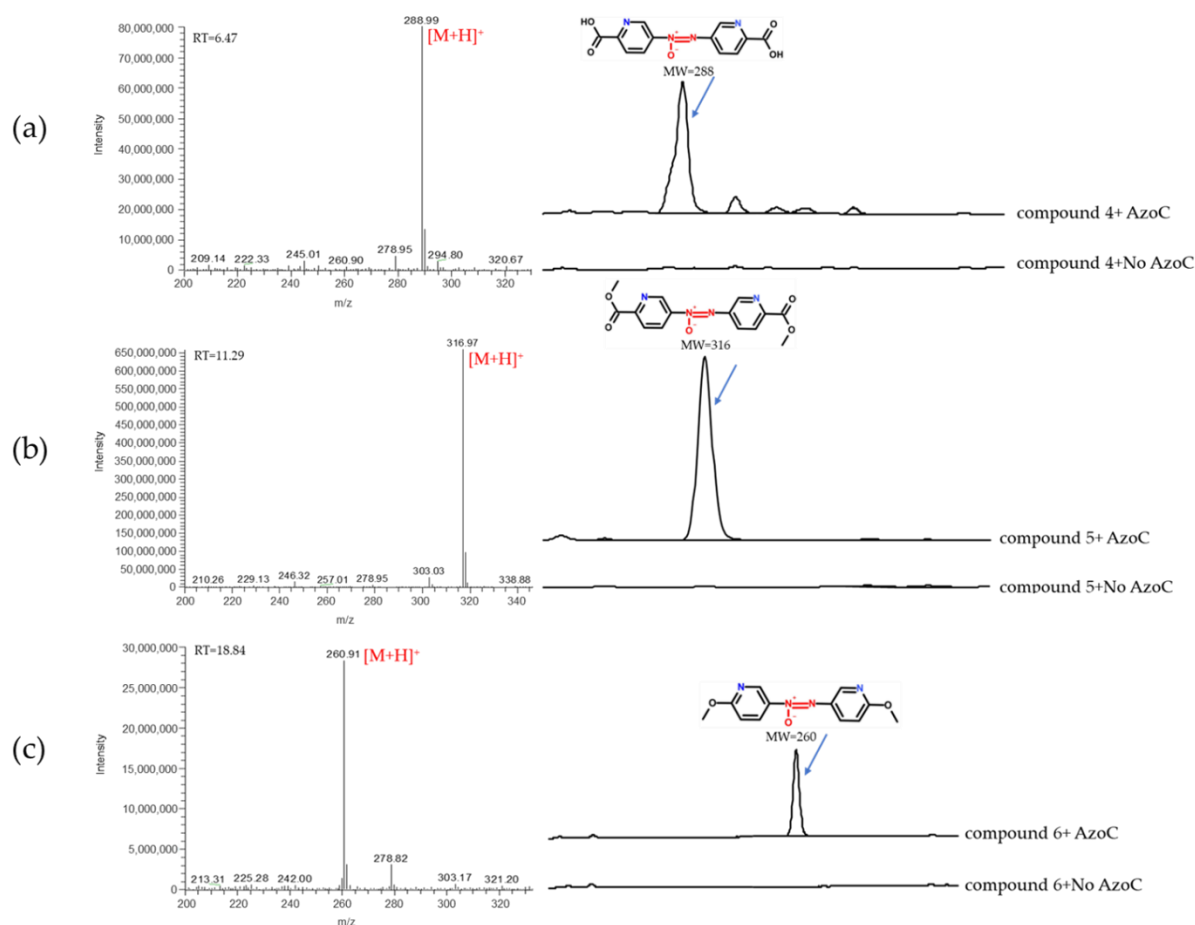

**Figure S2.** (a) LC-MS analysis of AzoC in vitro reaction with 5-aminopyridine-2-carboxylic acid (compound 4) as the substrate. The molecular weight of the generated azoxy product is 288, which is in line with the theoretical value. (b) LC-MS analysis of AzoC in vitro reaction with methyl 5-aminopyridine-2-carboxylate (compound 5) as the substrate. The molecular weight of the generated azoxy product is 316, which is in line with the theoretical value. (c) LC-MS analysis of AzoC in vitro reaction with 2-methoxy-5-aminopyridine (compound 6) as the substrate. The molecular weight of the generated azoxy product is 260, which is in line with the theoretical value. All reactions were performed at 30 °C for overnight.

|      |     |                                                                                                                                                                                                                     |     |
|------|-----|---------------------------------------------------------------------------------------------------------------------------------------------------------------------------------------------------------------------|-----|
| AzoC | 1   | MSSRAPEELTGVQSPPELPAYDPDDQAENAVIARLAGNWHRRRAV--KREEPNLADLFELARDDYPERILPFRDHPTFRAL                                                                                                                                   | 78  |
| AurF | 1   | MREEQPHLATTWAA---RGWVEEEGIGSATLGRVRAVPRRAAVVNKADILDEWADYDTLVDPYPLEIVPFAEHPLFLAA                                                                                                                                     | 77  |
| CmII | 1   | -----HHHHHHHHAIAENAVINRLVGNWHRRRAV--KREEPDVYALFDPGRPDFREDMIPFRGHPIWERL                                                                                                                                              | 63  |
| AzoC | 79  | PPEDRARLLSWAWISYNRTTVLL <b>EG</b> <b>I</b> VNP <b>AF</b> <b>Q</b> LGLDGEFP <b>Q</b> PVSELMQ <b>R</b> SLAQAMVDE <b>Q</b> YHTLMHLNASAVTRRRRGEA                                                                        | 158 |
| AurF | 78  | EPHQRQ <b>R</b> VLTMWIGYNERVIATE <b>EQ</b> LIAEP <b>AF</b> DLVMHGVFP <b>G</b> SD <b>D</b> PLIRK <b>S</b> V <b>Q</b> QAIVDES <b>F</b> HTYMHMLAIDRTREL <b>R</b> K--                                                   | 155 |
| CmII | 64  | SDETR <b>S</b> RLLSWG <b>W</b> WAYNRNTVL <b>IE</b> <b>Q</b> <b>R</b> I <b>AN</b> PA <b>F</b> <b>EL</b> VIGGAY <b>P</b> GLGG <b>Q</b> Q <b>L</b> ELAV <b>A</b> QAMVDE <b>Q</b> YHTLMHINGS <b>A</b> VTRRM <b>R</b> SD | 143 |
| AzoC | 159 | FADAALPKPLV <b>V</b> REHEAR--LASCANERERRLTTLAFATVA <b>E</b> ISINAYLNLIADDKEIQPVNSATVRIHNRDEYCHASIS                                                                                                                  | 236 |
| AurF | 156 | ISERP-PQPELVTYRRLRRVLAD <b>M</b> PEQWERDIAVLVWGAVA <b>E</b> TCINALLALLARDATIQPMHSLITTLHLRDETAHGSIV                                                                                                                  | 234 |
| CmII | 144 | FSDRVL <b>P</b> DSHITTIHQEH--LDRCEEPWQ <b>R</b> SLTTLGFATVA <b>E</b> ISINAYLDLLADDQ <b>E</b> IQVVNSTTVKLHNRDEYCHASIS                                                                                                | 221 |
| AzoC | 237 | AVLAEQVHHTLDDGERRYFLQSLVAGLEAFVGNDFMAWHRIMDEAGIRGGHEMLDDIQHAGGRKRLVQDFSGRLK <b>L</b> VERL                                                                                                                           | 316 |
| AurF | 235 | VEVVRELYARMNEQ <b>Q</b> RRALVRCLPIALEAF <b>A</b> EQDLSALLLELNAAGIRGAEEIVGDLRSTAGGTRLVRDFSGARKMVEQL                                                                                                                  | 314 |
| CmII | 222 | GEMMKQVYEALPADRRRFLLEKVVAGLEAFVAPDFTTWESIVAFEGVPGWEKAAAEVREAGGGTHLVQDHSGIHTLLTEM                                                                                                                                    | 301 |
| AzoC | 317 | DAVDDLD <b>F</b> DWSRSVTGSDAVSPTR                                                                                                                                                                                   | 340 |
| AurF | 315 | GLDDAVDFDFPERPDWSPHTP--R                                                                                                                                                                                            | 336 |
| CmII | 302 | DVLDQVEFGWGTTVT-----R                                                                                                                                                                                               | 317 |

**Figure S3.** Sequence alignment of AzoC (an N-oxygenase; accession number: AKQ24642), AurF (an N-oxygenase; accession number: CAE02601), and CmII (an aryl amine oxidase; accession number: 5HYH\_A). Iron binding motifs were marked in red. The AzoC mutants Q104R, Q111E, I199T were highlighted in blue, yellow and grey.

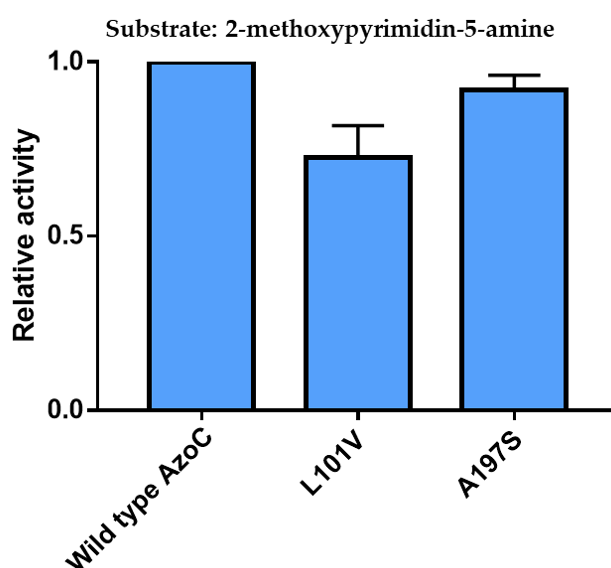

**Figure S4.** Comparison of the enzyme activity toward 2-methoxypyrimidine-5-amine between wild type AzoC and the mutants L101V, A197S. All reactions were performed with purified protein at 30 °C for overnight in two parallel, respectively. SD bars were shown in the figure.

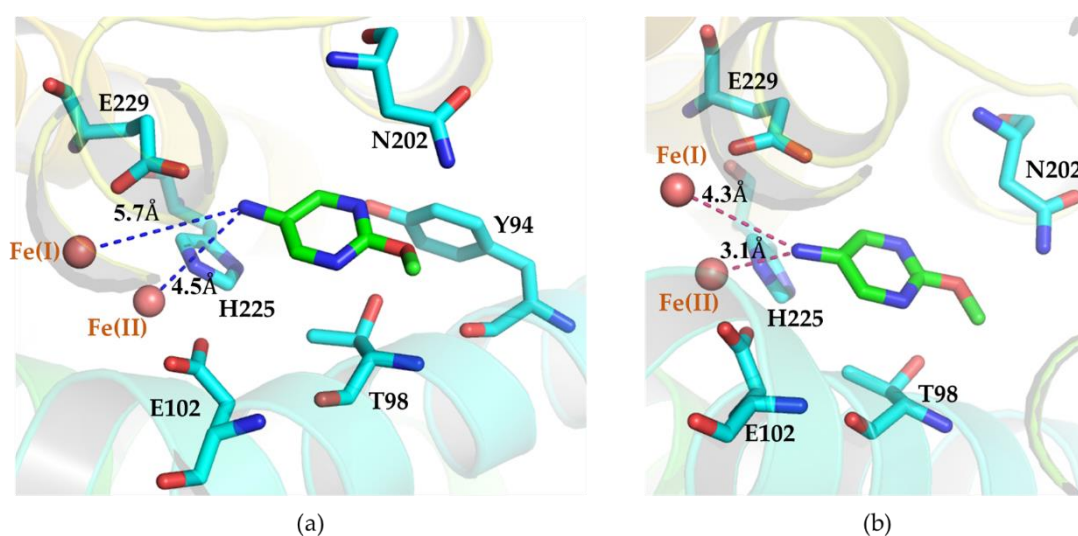

**Figure S5.** (a) Docking of 2-methoxypyrimidin-5-amine into wild type AzoC. The iron ions were shown as brown spheres. The polar interaction with residues N202, Y94, T98 was not shown in the figure. The distance between the nitrogen atom on the amino group of the substrate and Fe(I), Fe(II) respectively were 5.7 Å and 4.5 Å. (b) Docking of 2-methoxypyrimidin-5-amine into the mutant L101I/Q104R. The iron ions were shown as brown spheres. The polar interaction with residues N202, T98 was not shown in the figure. The distance between the nitrogen atom on the amino group of the substrate and Fe(I), Fe(II) respectively were 4.3 Å and 3.1 Å.

**Table S1.** The activity of the mutation in or near active site.

| Mutation                | Activity |
|-------------------------|----------|
| E102A                   | -        |
| E137A                   | -        |
| E198A                   | -        |
| E229A                   | -        |
| H140A                   | -        |
| H225A                   | -        |
| H232A                   | -        |
| H140R                   | -        |
| H225R                   | -        |
| H232R                   | -        |
| E102D/E229D             | -        |
| E102D/E137D             | -        |
| E102D/E137D/E229D       | -        |
| E102D/E137D/E198D/E229D | -        |
| D136E                   | -        |
| D228E                   | -        |

Note: “-” means “No activity”.

**Table S2.** The activity of the crude cell lysate of the mutation in L101, V106, A197, S200, N202 and F266 toward 2-methoxypyrimidin-5-amine.

| Mutation         | Activity |
|------------------|----------|
| Negative control | -        |
| Wild type AzoC   | +        |
| L101G            | -        |
| L101A            | -        |
| L101V            | ++       |
| L101M            | +        |
| L101I            | ++       |
| L101S            | -        |
| L101T            | +        |
| L101C            | +        |
| L101P            | -        |
| L101N            | -        |
| L101Q            | -        |
| L101K            | -        |
| L101R            | -        |
| L101H            | -        |
| L101D            | -        |
| L101E            | -        |
| L101F            | +        |
| L101Y            | +        |
| L101W            | -        |
| V106G            | -        |
| V106A            | -        |
| V106L            | -        |
| V106M            | +        |
| V106I            | +        |
| V106S            | -        |
| V106T            | +        |
| V106C            | +        |
| V106P            | -        |
| V106N            | -        |

---

|       |    |
|-------|----|
| V106Q | -  |
| V106K | -  |
| V106R | -  |
| V106H | -  |
| V106D | -  |
| V106E | -  |
| V106F | -  |
| V106Y | -  |
| V106W | -  |
| A197G | +  |
| A197V | +  |
| A197L | -  |
| A197M | -  |
| A197I | +  |
| A197S | ++ |
| A197T | -  |
| A197C | -  |
| A197P | -  |
| A197N | -  |
| A197Q | -  |
| A197K | -  |
| A197R | -  |
| A197H | -  |
| A197D | -  |
| A197E | -  |
| A197F | -  |
| A197Y | -  |
| A197W | -  |
| S200G | -  |
| S200V | -  |
| S200L | -  |
| S200M | -  |
| S200I | -  |
| S200A | -  |
| S200T | +  |

---

---

|       |   |
|-------|---|
| S200C | - |
| S200P | - |
| S200N | - |
| S200Q | - |
| S200K | - |
| S200R | - |
| S200H | - |
| S200D | - |
| S200E | - |
| S200F | - |
| S200Y | - |
| S200W | - |
| N202G | - |
| N202V | - |
| N202L | - |
| N202M | - |
| N202I | - |
| N202A | - |
| N202T | - |
| N202C | - |
| N202P | + |
| N202S | - |
| N202Q | + |
| N202K | - |
| N202R | - |
| N202H | - |
| N202D | - |
| N202E | - |
| N202F | - |
| N202Y | - |
| N202W | - |
| F266G | - |
| F266V | + |
| F266L | - |
| F266M | + |

---

|       |   |
|-------|---|
| F266I | + |
| F266A | - |
| F266T | - |
| F266C | - |
| F266P | - |
| F266S | - |
| F266Q | - |
| F266K | - |
| F266R | - |
| F266H | - |
| F266D | - |
| F266E | - |
| F266N | - |
| F266Y | - |
| F266W | - |

Note: “+” means that the mutant has activity toward the substrate, but the peak area of the azoxy product is similar to or smaller than that of wild type AzoC. “++” means that the mutant has activity toward the substrate, and the peak area of the azoxy product is bigger than that of wild type AzoC. “-” means that the mutant has no activity toward the substrate. “Negative control” is the crude cell lysate of *Escherichia coli* BL21(DE3) transformed by the plasmid harboring no target gene.

**Table S3.** The activity of the crude cell lysate of Q104R, Q111E and I199T toward 2-methoxypyrimidin-5-amine.

| Mutation         | Activity |
|------------------|----------|
| Negative control | -        |
| Wild type AzoC   | +        |
| Q104R            | ++       |
| Q111E            | -        |
| I199T            | +        |

Note: “+” means that the mutant has activity toward the substrate, but the peak area of the azoxy product is similar to or smaller than that of wild type AzoC. “++” means that the mutant has activity toward the substrate, and the peak area of the azoxy product is bigger than that of wild type AzoC. “-” means that the mutant has no activity toward the substrate. “Negative control” is the crude cell lysate of *Escherichia coli* BL21(DE3) transformed by the plasmid harboring no target gene.

**Table S4.** The primers for site-directed saturation mutation.

| Name of primers | Sequence (5' to 3')               |
|-----------------|-----------------------------------|
| xy-101Ala-R     | cgcaccacggtgctgGCGgaggggcagatcgtc |
| XY-101Ala-F     | gacgatctgccctcCGCagcaccgtggtgcg   |
| xy-101Gly-R     | cgcaccacggtgctgGGGgaggggcagatcgtc |
| XY-101Gly-F     | gacgatctgccctcCCCagcaccgtggtgcg   |
| xy-101Val-R     | cgcaccacggtgctgGTGgaggggcagatcgtc |
| XY-101Val-F     | gacgatctgccctcCACagcaccgtggtgcg   |
| xy-101Ile-R     | cgcaccacggtgctgATCgaggggcagatcgtc |
| XY-101Ile-F     | gacgatctgccctcGATcagcaccgtggtgcg  |
| xy-101Ser-R     | cgcaccacggtgctgTCCgaggggcagatcgtc |
| XY-101Ser-F     | gacgatctgccctcGGAagcaccgtggtgcg   |
| xy-101Cys-R     | cgcaccacggtgctgTGCgaggggcagatcgtc |
| XY-101Cys-F     | gacgatctgccctcGCAagcaccgtggtgcg   |
| xy-101Lys-R     | cgcaccacggtgctgAAGgaggggcagatcgtc |
| XY-101Lys-F     | gacgatctgccctcCTTcagcaccgtggtgcg  |
| xy-101His-R     | cgcaccacggtgctgCACgaggggcagatcgtc |
| XY-101His-F     | gacgatctgccctcGTGcagcaccgtggtgcg  |
| xy-101Glu-R     | cgcaccacggtgctgGAGgaggggcagatcgtc |
| XY-101Glu-F     | gacgatctgccctcCTCagcaccgtggtgcg   |
| xy-101Phe-R     | cgcaccacggtgctgCTTgaggggcagatcgtc |
| XY-101Phe-F     | gacgatctgccctcGAAagcaccgtggtgcg   |
| xy-101Tyr-R     | cgcaccacggtgctgTACgaggggcagatcgtc |
| XY-101Tyr-F     | gacgatctgccctcGTAcagcaccgtggtgcg  |
| xy-101Trp-R     | cgcaccacggtgctgTGGgaggggcagatcgtc |
| XY-101Trp-F     | gacgatctgccctcCCAagcaccgtggtgcg   |
| xy-101-R        | cgcaccacggtgctgNNKgaggggcagatcgtc |
| XY-101-F        | gacgatctgccctcMNNcagcaccgtggtgcg  |
| xy-106ILE-R     | cgaggggcagatcATCaatcctgcgttc      |
| XY-106ILE-F     | ggaacgcaggattGATgatctgccctcg      |
| xy-106GLY-R     | cgaggggcagatcGTAatcctgcgttc       |
| XY-106GLY-F     | ggaacgcaggattACCGatctgccctcg      |
| xy-106HIS-R     | cgaggggcagatcACAatcctgcgttc       |
| XY-106HIS-F     | ggaacgcaggattGTGgatctgccctcg      |
| xy-106CYS-R     | cgaggggcagatcTGCAatcctgcgttc      |
| XY-106CYS-F     | ggaacgcaggattGCAgatctgccctcg      |
| xy-106ALA-R     | cgaggggcagatcGCCaatcctgcgttc      |
| XY-106ALA-F     | ggaacgcaggattGGCGatctgccctcg      |
| xy-106LEU-R     | cgaggggcagatcCTGAatcctgcgttc      |
| XY-106LEU-F     | ggaacgcaggattCAGgatctgccctcg      |
| xy-106SER-R     | cgaggggcagatcAGCAatcctgcgttc      |
| XY-106SER-F     | ggaacgcaggattGCTgatctgccctcg      |
| xy-106TRP-R     | cgaggggcagatcTGGaatcctgcgttc      |
| XY-106TRP-F     | ggaacgcaggattCCAGatctgccctcg      |
| xy-106ASP-R     | cgaggggcagatcGACAatcctgcgttc      |
| XY-106ASP-F     | ggaacgcaggattGTCgatctgccctcg      |
| xy-106PHE-R     | cgaggggcagatcTTCaatcctgcgttc      |

---

|             |                    |                  |
|-------------|--------------------|------------------|
| XY-106PHE-F | ggaacgcaggattGA    | Agatctgccctcg    |
| xy-106TYR-R | cgaggggcagatcTATA  | atcctgcgttcc     |
| XY-106TYR-F | ggaacgcaggattATA   | gatctgccctcg     |
| XY-106-R    | ctcgaggggcagatcNN  | Kaatcctgcgttccag |
| XY-106-F    | ctggaacgcaggattMNN | gatctgccctcgag   |
| xy-197LEU-R | gccttcgccaccgtgCTG | gagatatccatcaac  |
| XY-197LEU-F | gttgatggatatctcCAG | cacggtggcgaaggc  |
| xy-197MET-R | gccttcgccaccgtgATG | gagatatccatcaac  |
| XY-197MET-F | gttgatggatatctcCAT | cacggtggcgaaggc  |
| xy-197ILE-R | gccttcgccaccgtgATC | gagatatccatcaac  |
| XY-197ILE-F | gttgatggatatctcGAT | cacggtggcgaaggc  |
| xy-197SER-R | gccttcgccaccgtgAGC | gagatatccatcaac  |
| XY-197SER-F | gttgatggatatctcGCT | cacggtggcgaaggc  |
| xy-197THR-R | gccttcgccaccgtgACC | gagatatccatcaac  |
| XY-197THR-F | gttgatggatatctcGGT | cacggtggcgaaggc  |
| xy-197CYS-R | gccttcgccaccgtGTG  | gagatatccatcaac  |
| XY-197CYS-F | gttgatggatatctcGCA | cacggtggcgaaggc  |
| xy-197LYS-R | gccttcgccaccgtAAG  | gagatatccatcaac  |
| XY-197LYS-F | gttgatggatatctcCTT | cacggtggcgaaggc  |
| xy-197PHE-R | gccttcgccaccgtTTC  | gagatatccatcaac  |
| XY-197PHE-F | gttgatggatatctcGAA | cacggtggcgaaggc  |
| xy-197TYR-R | gccttcgccaccgtTAT  | gagatatccatcaac  |
| XY-197TYR-F | gttgatggatatctcATA | cacggtggcgaaggc  |
| xy-197-R    | gccttcgccaccgtNNK  | gagatatccatcaac  |
| XY-197-F    | gttgatggatatctcMNN | cacggtggcgaaggc  |
| xy-200GLY-R | accgtggccgagataGGT | atcaacgcctatctg  |
| XY-200GLY-F | cagataggcgttgatACC | tatctcgccacggt   |
| xy-200ASN-R | accgtggccgagataAAC | atcaacgcctatctg  |
| XY-200ASN-F | cagataggcgttgatGTT | tatctcgccacggt   |
| xy-200ILE-R | accgtggccgagataATC | atcaacgcctatctg  |
| XY-200ILE-F | cagataggcgttgatGAT | tatctcgccacggt   |
| xy-200GLN-R | accgtggccgagataCAG | atcaacgcctatctg  |
| XY-200GLN-F | cagataggcgttgatCTG | tatctcgccacggt   |
| xy-200ARG-R | accgtggccgagataCGG | atcaacgcctatctg  |
| XY-200ARG-F | cagataggcgttgatGCC | tatctcgccacggt   |
| xy-200CYS-R | accgtggccgagataTGC | atcaacgcctatctg  |
| XY-200CYS-F | cagataggcgttgatGCA | tatctcgccacggt   |
| xy-200LYS-R | accgtggccgagataAAG | atcaacgcctatctg  |
| XY-200LYS-F | cagataggcgttgatCTT | tatctcgccacggt   |
| xy-200HIS-R | accgtggccgagataCAC | atcaacgcctatctg  |
| XY-200HIS-F | cagataggcgttgatGTG | tatctcgccacggt   |
| xy-200GLU-R | accgtggccgagataGAG | atcaacgcctatctg  |
| XY-200GLU-F | cagataggcgttgatCTC | tatctcgccacggt   |
| xy-200TRP-R | accgtggccgagataTGG | atcaacgcctatctg  |
| XY-200TRP-F | cagataggcgttgatCCA | tatctcgccacggt   |
| XY-200-R    | accgtggccgagataNNK | atcaacgcctatctg  |
| XY-200-F    | cagataggcgttgatMNN | tatctcgccacggt   |
| XY-202ARG-F | ggttcagataggcCCG   | gatggatatctcg    |
| XY-202ARG-R | cgagatatccatcCGG   | gcctatctgaacc    |
| XY-202ASP-F | ggttcagataggcGTC   | gatggatatctcg    |
| XY-202ASP-R | cgagatatccatcGAC   | gcctatctgaacc    |

---

---

|             |                                   |
|-------------|-----------------------------------|
| XY-202GLU-F | ggttcagataggcCTCgatggatatctcg     |
| XY-202GLU-R | cgagatatccatcGAGgcctatctgaacc     |
| XY-202HIS-F | ggttcagataggcGTGgatggatatctcg     |
| XY-202HIS-R | cgagatatccatcCACgcctatctgaacc     |
| XY-202TRP-F | ggttcagataggcCCAgatggatatctcg     |
| XY-202TRP-R | cgagatatccatcTGGgcctatctgaacc     |
| XY-202CYS-F | caggttcagataggcGCAgatggatatctcggc |
| XY-202CYS-R | gccgagatatccatcTGCgcctatctgaacctg |
| XY-202PHE-F | caggttcagataggcGAAgatggatatctcggc |
| XY-202PHE-R | gccgagatatccatcTTCgcctatctgaacctg |
| XY-202SER-F | caggttcagataggcGCTgatggatatctcggc |
| XY-202SER-R | gccgagatatccatcAGCgcctatctgaacctg |
| XY-202THR-F | caggttcagataggcCGTgatggatatctcggc |
| XY-202THR-R | gccgagatatccatcACGgcctatctgaacctg |
| XY-202TYR-F | caggttcagataggcGTAgatggatatctcggc |
| XY-202TYR-R | gccgagatatccatcTACgcctatctgaacctg |
| XY-202-F    | ggttcagataggcMNNgatggatatctcg     |
| XY-202-R    | cgagatatccatcNNKgcctatctgaacc     |
| xy-266ILE-R | ggtctcgaggcgATCgtcggcaacgac       |
| XY-266ILE-F | gtcgttgccgacGATcgctcgagacc        |
| xy-266VAL-R | ggtctcgaggcgGTCgtcggcaacgac       |
| XY-266VAL-F | gtcgttgccgacGACgcctcgagacc        |
| xy-266TYR-R | ggtctcgaggcgTATgtcggcaacgac       |
| XY-266TYR-F | gtcgttgccgacATAcgctcgagacc        |
| xy-266GLN-R | ggtctcgaggcgCAGgtcggcaacgac       |
| XY-266GLN-F | gtcgttgccgacCTGcgctcgagacc        |
| xy-266ALA-R | ggtctcgaggcgGCCgtcggcaacgac       |
| XY-266ALA-F | gtcgttgccgacGGCcgctcgagacc        |
| xy-266GLU-R | ggtctcgaggcgGAGgtcggcaacgac       |
| XY-266GLU-F | gtcgttgccgacCTCcgctcgagacc        |
| xy-266SER-R | ggtctcgaggcgTCCgtcggcaacgac       |
| XY-266SER-F | gtcgttgccgacGGAcgctcgagacc        |
| xy-266LYS-R | ggtctcgaggcgAAGgtcggcaacgac       |
| XY-266LYS-F | gtcgttgccgacCTTcgctcgagacc        |
| xy-266ASP-R | ggtctcgaggcgGATgtcggcaacgac       |
| XY-266ASP-F | gtcgttgccgacATCcgctcgagacc        |
| XY-266-R    | cggctctgaggcgNNKgtcggcaacgact     |
| XY-266-F    | agtcgttgccgacMNNcgctcgagaccg      |

---

Note: the mutation site is marked with capital letters.

**Table S5.** The primers of Q111E, Q104R, I199T.

| Name of primers | Sequence (5' to 3')           |
|-----------------|-------------------------------|
| xy-111E-R       | atcctgcgttcGAGctcggcctgga     |
| XY-111E-F       | tccaggccgagCTCgaacgcaggat     |
| XY-Q104R-R      | gctgctcgaggggCGCatcgtcaatcctg |
| XY-Q104R-F      | caggattgacgatGCGcccctcgagcagc |
| XY-I199T-R      | caccgtggccgagACGtccatcaacgcct |
| XY-I199T-F      | aggcgttgatggaCGTctcggccacggtg |
| xy-101104-R     | accacggtgctgATCgaggggCGGatc   |
| XY-101104-F     | gatCCGcccctcGATcagcacctgggt   |

Note: the mutation site is marked with capital letters.
